# Supplementary material for: Molecular packing preferences in “bridge-flipped” isomeric aryl-2-pyridylhydrazones and 2-pyridinecarboxaldehyde arylhydrazones
Source: Royal Society of Chemistry journal article supplement (doi:10.1039/c6ce01519k), 2016-01-01
Supplement: c6ce01519k1.pdf [file c6ce01519k1.pdf]

**Figure S1.** Structural formulas of compounds identified by CSD refcode in this report.

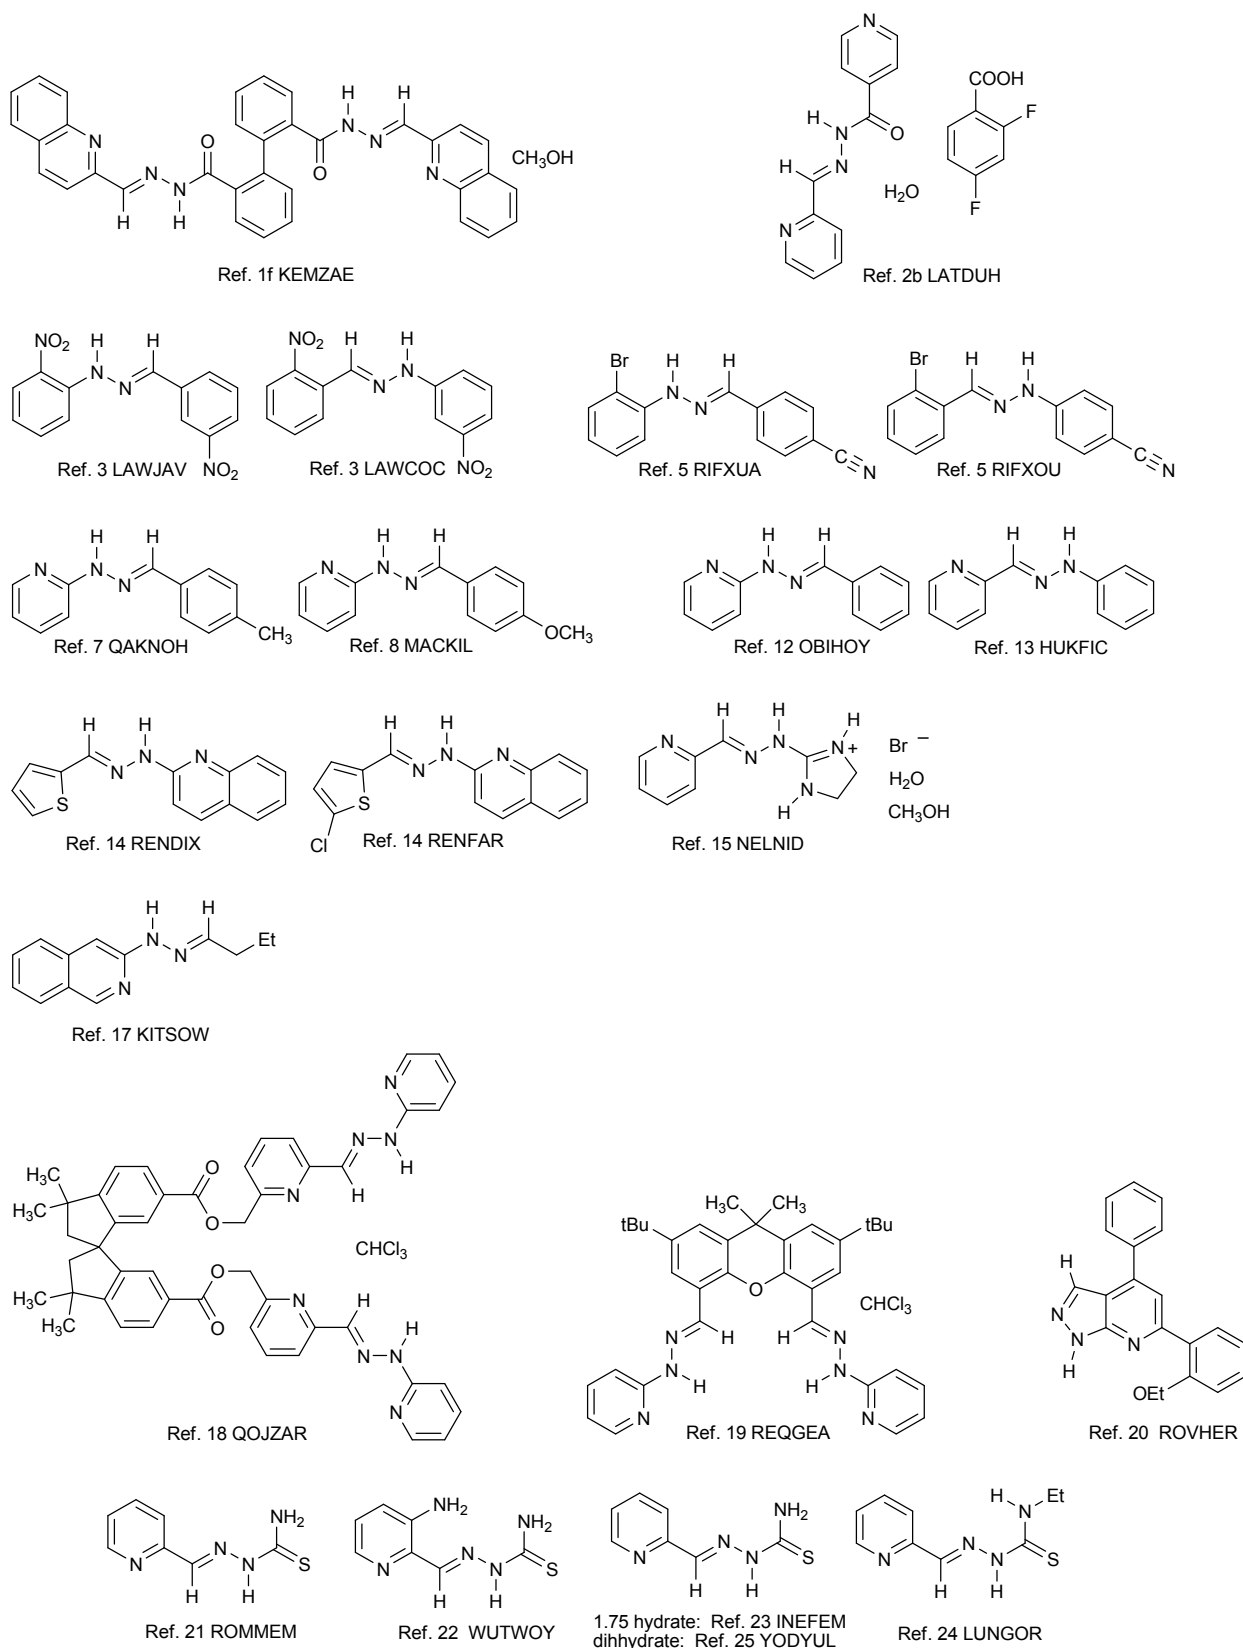

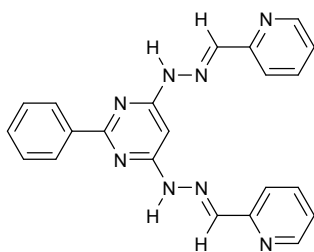

Ref. 26 JIQWUC

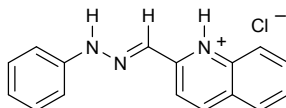

Ref. 27 DOSBEU

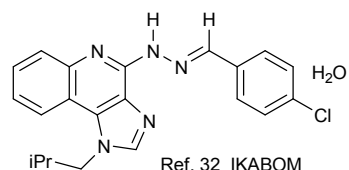

Ref. 32 IKABOM

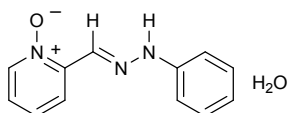

Ref. 33 EZELEA

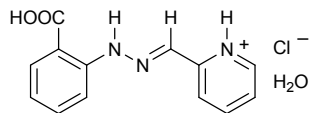

Ref. 34 LOLYIW

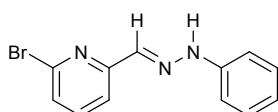

Ref. 35 XAZZEF

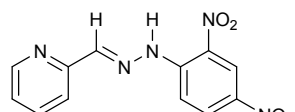

Ref. 36 XAVPEQ

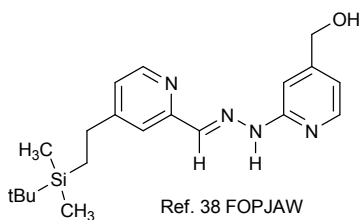

Ref. 38 FOPJAW

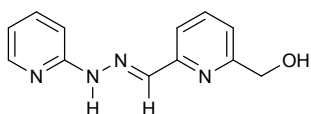

Ref. 39 OJAQOH
